# Supplementary material for: Network-centric medicine for peripheral nerve injury: treating the whole to boost endogenous mechanisms of neuroprotection and regeneration
Source: PubMed Central journal article supplement — Neural Regen Res. 2019 Jul;14(7):1122–8. doi: 10.4103/1673-5374.251187 (PMC6425822; doi:10.4103/1673-5374.251187), 2019-07
Supplement: NRR-14-1122_Suppl2.pdf [file NRR-14-1122_Suppl2.pdf]

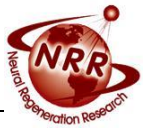**OPEN PEER REVIEW REPORT 2**

**Name of journal:** Neural Regeneration Research

**Manuscript NO:** NRR-D-18-00190

**Title:** Network-centric medicine for peripheral nerve injury: treating the whole to boost endogenous mechanisms of neuroprotection and regeneration

**Reviewer's Name:** Shanji Nan

**Reviewer's country:** China

**Date sent for review:** 2018-05-10

**Date reviewed:** 2018-05-19

**Review time:** 9 days

**COMMENTS TO AUTHORS**

This is an interesting paper. The authors designed a drug discovery workflow based on a network-centric molecular vision using unbiased proteomic data and neural artificial computational tools. They discovered NeuroHeal, a combination of two drugs which promotes MN neuroprotection. They carried out a complete thought in the process of research and came to a meaningful conclusion.
